# Supplementary material
Source: PubMed Central journal article supplement (PMC3672956)
Supplement: NIHMS50877-supplement-Appendix_1.pdf [file NIHMS50877-supplement-Appendix_1.pdf]

## Search Strategy

### Ovid Medline

| Serial No. | Search Term                                                                                                                                                                                            | Comment                                       | Results |
|------------|--------------------------------------------------------------------------------------------------------------------------------------------------------------------------------------------------------|-----------------------------------------------|---------|
| 1          | Somatoform Disorders.mp. [mp=title, abstract, original title, name of substance word, subject heading word, protocol supplementary concept, rare disease supplementary concept, unique identifier]     | Search term used without mapping to MESH term | 7609    |
| 2          | Body Dysmorphic Disorder.mp. [mp=title, abstract, original title, name of substance word, subject heading word, protocol supplementary concept, rare disease supplementary concept, unique identifier] | Search term used without mapping to MESH term | 566     |
| 3          | conversion disorders/                                                                                                                                                                                  | Search term mapped to MESH term               | 1762    |
| 4          | hypochondriasis.mp. [mp=title, abstract, original title, name of substance word, subject heading word, protocol supplementary concept, rare disease supplementary concept, unique identifier]          | Search term used without mapping to MESH term | 2547    |
| 5          | neurasthenia.mp. [mp=title, abstract, original title, name of substance word, subject heading word, protocol supplementary concept, rare disease supplementary concept, unique identifier]             | Search term used without mapping to MESH term | 1472    |
| 6          | Fibromyalgia.mp. [mp=title, abstract, original title, name of substance word, subject heading word, protocol supplementary concept, rare disease supplementary concept, unique identifier]             | Search term used without mapping to MESH term | 6814    |
| 7          | chronic fatigue syndrome.mp. [mp=title, abstract, original title, name of substance word, subject heading word, protocol supplementary concept, rare disease supplementary concept, unique identifier] | Search term used without mapping to MESH term | 3707    |
| 8          | ((unexplain\$ or inexpl\$) and (health\$ or medical\$ or physical\$) and (sympt\$ or problem\$ or condition\$ or                                                                                       |                                               | 2613    |

|    |                                                                                                                                                                                                                                                                                                                                                                                                                                                                                                                          |                                                                                                                                                                                                       |         |
|----|--------------------------------------------------------------------------------------------------------------------------------------------------------------------------------------------------------------------------------------------------------------------------------------------------------------------------------------------------------------------------------------------------------------------------------------------------------------------------------------------------------------------------|-------------------------------------------------------------------------------------------------------------------------------------------------------------------------------------------------------|---------|
|    | complain\$)).ti,ab.                                                                                                                                                                                                                                                                                                                                                                                                                                                                                                      |                                                                                                                                                                                                       |         |
| 9  | idioms of distress.mp.                                                                                                                                                                                                                                                                                                                                                                                                                                                                                                   | Search term used without mapping to MESH term                                                                                                                                                         | 59      |
| 10 | Depression/di, dt, ec, ep, eh, et, pc, px, rh, th [Diagnosis, Drug Therapy, Economics, Epidemiology, Ethnology, Etiology, Prevention & Control, Psychology, Rehabilitation, Therapy]                                                                                                                                                                                                                                                                                                                                     | Search term mapped to MESH term and following sub-headings searched; Diagnosis, Drug Therapy, Economics, Epidemiology, Ethnology, Etiology, Prevention & Control, Psychology, Rehabilitation, Therapy | 50682   |
| 11 | Anxiety Disorders/di, dt, ec, ep, eh, et, pc, px, rh, th [Diagnosis, Drug Therapy, Economics, Epidemiology, Ethnology, Etiology, Prevention & Control, Psychology, Rehabilitation, Therapy]                                                                                                                                                                                                                                                                                                                              | Search term mapped to MESH term and following sub-headings searched; Diagnosis, Drug Therapy, Economics, Epidemiology, Ethnology, Etiology, Prevention & Control, Psychology, Rehabilitation, Therapy | 17904   |
| 12 | common mental disorder\$.mp.<br>[mp=title, abstract, original title, name of substance word, subject heading word, protocol supplementary concept, rare disease supplementary concept, unique identifier]                                                                                                                                                                                                                                                                                                                |                                                                                                                                                                                                       | 850     |
| 13 | (Afghanistan or Albania or Algeria or Angola or Antigua or Barbuda or Argentina or Armenia or Armenian or Aruba or Azerbaijan or Bahrain or Bangladesh or Barbados or Benin or Byelarus or Byelorussian or Belarus or Belorussian or Belorussia or Belize or Bhutan or Bolivia or Bosnia or Herzegovina or Hercegovina or Botswana or Brazil or Bulgaria or Burkina Faso or Burkina Fasso or Upper Volta or Burundi or Urundi or Cambodia or Khmer Republic or Kampuchea or Cameroon or Cameroons or Cameron or Camerons | List of all low and middle income countries. I got this from Cochrane Public Health Group website in the document titled 'LMIC filter'.                                                               | 1041187 |

|  |                                                                                                                                                                                                                                                                                                                                                                                                                                                                                                                                                                                                                                                                                                                                                                                                                                                                                                                                                                                                                                                                                                                                                                                                                                                                                                                                                                                                                                                                                                                                                                                                                                                                                                                                                                                                            |  |  |
|--|------------------------------------------------------------------------------------------------------------------------------------------------------------------------------------------------------------------------------------------------------------------------------------------------------------------------------------------------------------------------------------------------------------------------------------------------------------------------------------------------------------------------------------------------------------------------------------------------------------------------------------------------------------------------------------------------------------------------------------------------------------------------------------------------------------------------------------------------------------------------------------------------------------------------------------------------------------------------------------------------------------------------------------------------------------------------------------------------------------------------------------------------------------------------------------------------------------------------------------------------------------------------------------------------------------------------------------------------------------------------------------------------------------------------------------------------------------------------------------------------------------------------------------------------------------------------------------------------------------------------------------------------------------------------------------------------------------------------------------------------------------------------------------------------------------|--|--|
|  | <p>or Cape Verde or Central African Republic or Chad or Chile or China or Colombia or Comoros or Comoro Islands or Comores or Mayotte or Congo or Zaire or Costa Rica or Cote d'Ivoire or Ivory Coast or Croatia or Cuba or Cyprus or Czechoslovakia or Czech Republic or Slovakia or Slovak Republic or Djibouti or French Somaliland or Dominica or Dominican Republic or East Timor or East Timur or Timor Leste or Ecuador or Egypt or United Arab Republic or El Salvador or Eritrea or Estonia or Ethiopia or Fiji or Gabon or Gabonese Republic or Gambia or Gaza or Georgia Republic or Georgian Republic or Ghana or Gold Coast or Greece or Grenada or Guatemala or Guinea or Guam or Guiana or Guyana or Haiti or Honduras or Hungary or India or Maldives or Indonesia or Iran or Iraq or Isle of Man or Jamaica or Jordan or Kazakhstan or Kazakh or Kenya or Kiribati or Korea or Kosovo or Kyrgyzstan or Kirghizia or Kyrgyz Republic or Kirghiz or Kirgizstan or Lao PDR or Laos or Latvia or Lebanon or Lesotho or Basutoland or Liberia or Libya or Lithuania or Macedonia or Madagascar or Malagasy Republic or Malaysia or Malaya or Malay or Sabah or Sarawak or Malawi or Nyasaland or Mali or Malta or Marshall Islands or Mauritania or Mauritius or Agalega Islands or Mexico or Micronesia or Middle East or Moldova or Moldovia or Moldovian or Mongolia or Montenegro or Morocco or Ifni or Mozambique or Myanmar or Myanma or Burma or Namibia or Nepal or Netherlands Antilles or New Caledonia or Nicaragua or Niger or Nigeria or Northern Mariana Islands or Oman or Muscat or Pakistan or Palau or Palestine or Panama or Paraguay or Peru or Philippines or Philipines or Phillipines or Phillippines or Poland or Portugal or Puerto Rico or Romania or Rumania or</p> |  |  |
|--|------------------------------------------------------------------------------------------------------------------------------------------------------------------------------------------------------------------------------------------------------------------------------------------------------------------------------------------------------------------------------------------------------------------------------------------------------------------------------------------------------------------------------------------------------------------------------------------------------------------------------------------------------------------------------------------------------------------------------------------------------------------------------------------------------------------------------------------------------------------------------------------------------------------------------------------------------------------------------------------------------------------------------------------------------------------------------------------------------------------------------------------------------------------------------------------------------------------------------------------------------------------------------------------------------------------------------------------------------------------------------------------------------------------------------------------------------------------------------------------------------------------------------------------------------------------------------------------------------------------------------------------------------------------------------------------------------------------------------------------------------------------------------------------------------------|--|--|

|    |                                                                                                                                                                                                                                                                                                                                                                                                                                                                                                                                                                                                                                                                                                                                                                                                                                                                                                                                                                                                                                                                                           |                                                                             |        |
|----|-------------------------------------------------------------------------------------------------------------------------------------------------------------------------------------------------------------------------------------------------------------------------------------------------------------------------------------------------------------------------------------------------------------------------------------------------------------------------------------------------------------------------------------------------------------------------------------------------------------------------------------------------------------------------------------------------------------------------------------------------------------------------------------------------------------------------------------------------------------------------------------------------------------------------------------------------------------------------------------------------------------------------------------------------------------------------------------------|-----------------------------------------------------------------------------|--------|
|    | Roumania or Russia or Russian or Rwanda or Ruanda or Saint Kitts or St Kitts or Nevis or Saint Lucia or St Lucia or Saint Vincent or St Vincent or Grenadines or Samoa or Samoan Islands or Navigator Island or Navigator Islands or Sao Tome or Saudi Arabia or Senegal or Serbia or Montenegro or Seychelles or Sierra Leone or Slovenia or Sri Lanka or Ceylon or Solomon Islands or Somalia or Sudan or Suriname or Surinam or Swaziland or Syria or Tajikistan or Tadjikistan or Tadjikistan or Tadjik or Tanzania or Thailand or Togo or Togolese Republic or Tonga or Trinidad or Tobago or Tunisia or Turkey or Turkmenistan or Turkmen or Uganda or Ukraine or Uruguay or USSR or Soviet Union or Union of Soviet Socialist Republics or Uzbekistan or Uzbek or Vanuatu or New Hebrides or Venezuela or Vietnam or Viet Nam or West Bank or Yemen or Yugoslavia or Zambia or Zimbabwe or Rhodesia).mp. [mp=title, abstract, original title, name of substance word, subject heading word, protocol supplementary concept, rare disease supplementary concept, unique identifier] |                                                                             |        |
| 14 | ((("semi-structured" or semistructured or unstructured or informal or "in-depth" or indepth or "face-to-face" or structured or guide) adj3 (interview* or discussion* or questionnaire*)) or (focus group* or qualitative or ethnograph* or fieldwork or "field work" or "key informant")).ti,ab. or interviews as topic/ or focus groups/ or narration/ or qualitative research/                                                                                                                                                                                                                                                                                                                                                                                                                                                                                                                                                                                                                                                                                                         | Filter for qualitative studies                                              | 184663 |
| 15 | 1 or 2 or 3 or 4 or 5 or 6 or 7 or 8 or 9                                                                                                                                                                                                                                                                                                                                                                                                                                                                                                                                                                                                                                                                                                                                                                                                                                                                                                                                                                                                                                                 | Somatoform disorders and alternative terms for somatoform disorders         | 24646  |
| 16 | 15 and 13                                                                                                                                                                                                                                                                                                                                                                                                                                                                                                                                                                                                                                                                                                                                                                                                                                                                                                                                                                                                                                                                                 | Somatoform disorders and alternative terms for somatoform disorders in LMIC | 1121   |
| 17 | limit 16 to (female and yr="1994 -                                                                                                                                                                                                                                                                                                                                                                                                                                                                                                                                                                                                                                                                                                                                                                                                                                                                                                                                                                                                                                                        | The above search limited                                                    | 614    |

|    |                                              |                                                                                                                                                          |     |
|----|----------------------------------------------|----------------------------------------------------------------------------------------------------------------------------------------------------------|-----|
|    | Current")                                    | to females and papers after 1994, the year when ICD-10 and DSM-IV were out.                                                                              |     |
| 18 | 15 and 13 and 14                             | Qualitative studies on Somatoform disorders and alternative terms for somatoform disorders in LMIC                                                       | 104 |
| 19 | limit 18 to (female and yr="1994 - Current") | The above search limited to females and papers after 1994, the year when ICD-10 and DSM-IV were out.                                                     | 78  |
| 20 | 15 and (10 or 11 or 12) and 13               | Somatoform disorders and alternative terms for somatoform disorders and (depression or anxiety or common mental disorder) in LMIC                        | 183 |
| 21 | limit 20 to (female and yr="1994 - Current") | The above search limited to females and papers after 1994, the year when ICD-10 and DSM-IV were out.                                                     | 128 |
| 22 | 20 and 14                                    | Qualitative studies on somatoform disorders and alternative terms for somatoform disorders and (depression or anxiety or common mental disorder) in LMIC | 29  |
| 23 | limit 22 to (female and yr="1994 - Current") | The above search limited to females and papers after 1994, the year when ICD-10 and DSM-IV were out.                                                     | 25  |
